# Supplementary material for: Dimethyl Ether Oxidation over Copper Ferrite Catalysts
Source: MDPI journal article supplement (doi:10.3390/catal12060604), 2022-06-02
Supplement: s1 [file s1]

## Supplementary information

# Dimethyl Ether Oxidation Over Copper Ferrite Catalysts

Maria Smyrnioti<sup>1,2</sup> and Theophilos Ioannides<sup>1,\*</sup>

<sup>1</sup> Foundation for Research & Technology-Hellas, Institute of Chemical Engineering Sciences (FORTH/ICE-HT), Stadiou str., Platani, Patras, GR-26504, Greece;

<sup>2</sup> University of Patras, Department of Chemistry, Patras, GR-26504, Greece

\* Correspondence: theo@iceht.forth.gr

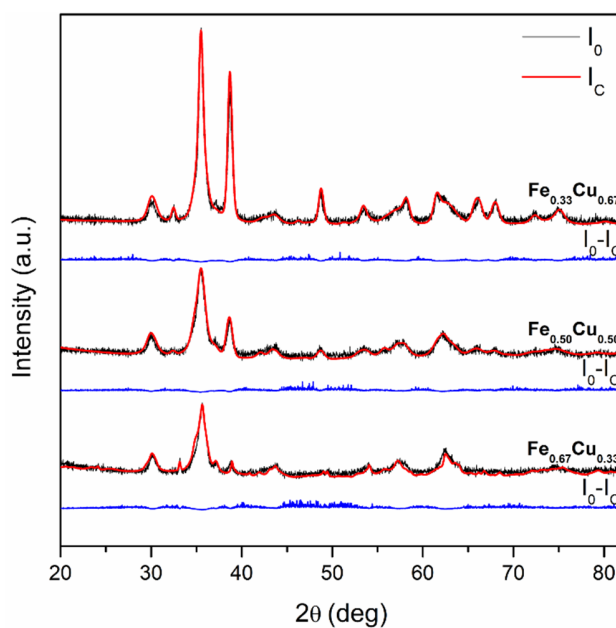

**Figure S1.** Rietveld refined XRD diffractograms of Fe<sub>x</sub>Cu<sub>1-x</sub> catalysts. (I<sub>0</sub>:observed, I<sub>c</sub>:calculated, I<sub>0</sub>-I<sub>c</sub>: difference)

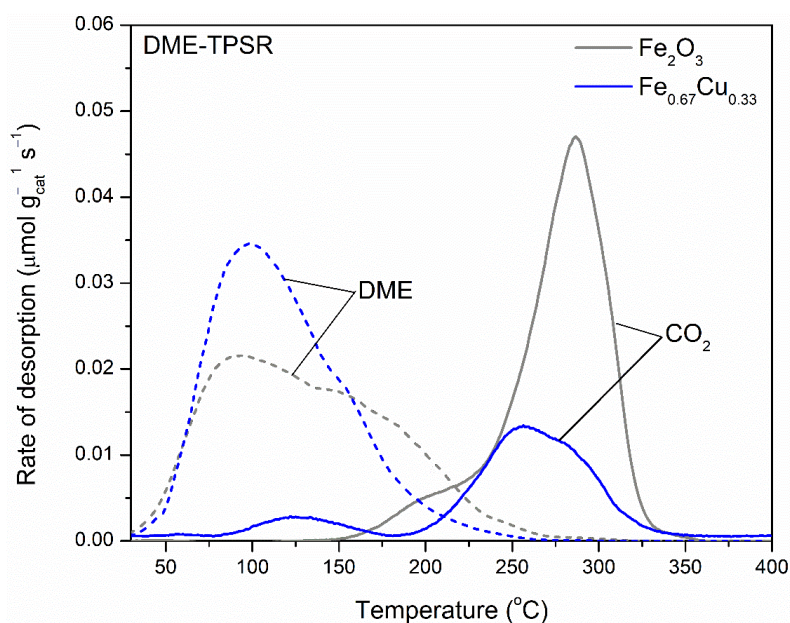

**Figure S2.** DME-TPSR profiles of  $\text{Fe}_{0.67}\text{Cu}_{0.33}$  and  $\text{Fe}_2\text{O}_3$  catalysts. Conditions: adsorption: 0.1% DME/He, carrier gas: 1%  $\text{O}_2$ /He, flow:  $30 \text{ cm}^3 \text{ min}^{-1}$ .

**Table S1.** Amounts of desorbed DME and  $\text{CO}_2$  expressed per catalyst weight and surface area over  $\text{Fe}_x\text{Cu}_{1-x}$  catalysts ( $0.33 \leq x \leq 0.67$ ) and single  $\text{Fe}_2\text{O}_3$  and  $\text{CuO}$  oxides during DME-TPD and DME-TPSR experiments.

| Catalyst                           | DME-TPD                             |               |                        |               | DME-TPSR                            |               |                        |               |
|------------------------------------|-------------------------------------|---------------|------------------------|---------------|-------------------------------------|---------------|------------------------|---------------|
|                                    | $\mu\text{mol g}_{\text{cat}}^{-1}$ |               | $\mu\text{mol m}^{-2}$ |               | $\mu\text{mol g}_{\text{cat}}^{-1}$ |               | $\mu\text{mol m}^{-2}$ |               |
|                                    | DME                                 | $\text{CO}_2$ | DME                    | $\text{CO}_2$ | DME                                 | $\text{CO}_2$ | DME                    | $\text{CO}_2$ |
| $\text{Fe}_2\text{O}_3$            | 23.6                                | 13.5          | 1.39                   | 0.79          | 17.6                                | 22.1          | 1.04                   | 1.30          |
| $\text{Fe}_{0.67}\text{Cu}_{0.33}$ | 17.6                                | 7.6           | 0.53                   | 0.23          | 18.9                                | 12.8          | 0.57                   | 0.39          |
| $\text{Fe}_{0.50}\text{Cu}_{0.50}$ | 21.1                                | 6.8           | 0.68                   | 0.22          |                                     |               |                        |               |
| $\text{Fe}_{0.33}\text{Cu}_{0.67}$ | 7.3                                 | 3             | 0.43                   | 0.18          |                                     |               |                        |               |
| $\text{CuO}$                       | -                                   | 0.8           | -                      | 0.53          |                                     |               |                        |               |

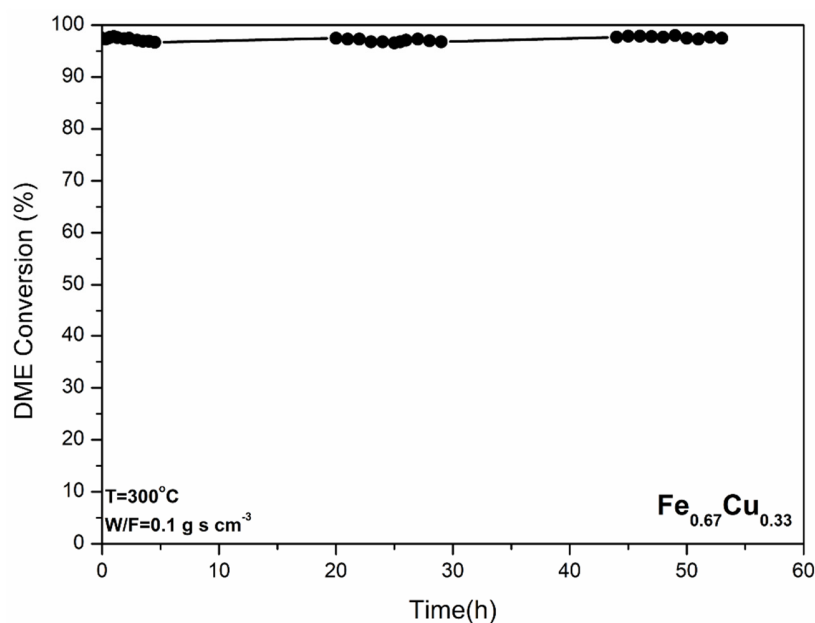

**Figure S3.** Stability test of  $\text{Fe}_{0.67}\text{Cu}_{0.33}$  catalyst. Reaction conditions: 900 ppm DME and 8%  $\text{O}_2$ ,  $T=300^\circ\text{C}$ ,  $W/F = 0.1 \text{ g s cm}^{-3}$

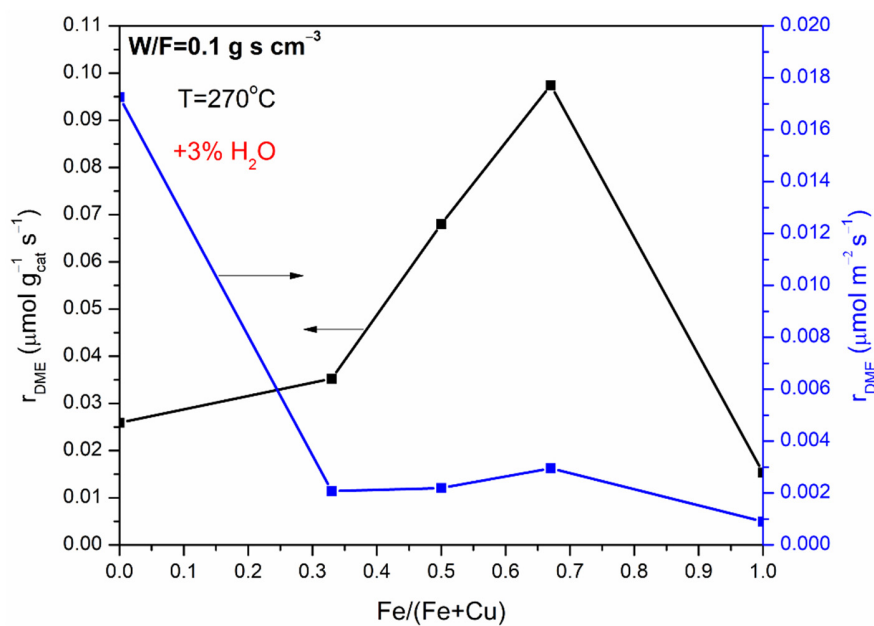

**Figure S4.** Variation of DME oxidation rates in the presence of  $\text{H}_2\text{O}$  vapor expressed per catalyst weight (in  $\mu\text{mol g}_{\text{cat}}^{-1} \text{s}^{-1}$ , left axis) and specific reaction rates (in  $\mu\text{mol m}^{-2} \text{s}^{-1}$ , right axis) with the  $\text{Fe}/(\text{Fe} + \text{Cu})$  molar ratio. Reaction conditions: 900 ppm DME 8%  $\text{O}_2$  and 3%  $\text{H}_2\text{O}$ , reaction temperature= $270^\circ\text{C}$ ,  $W/F = 0.1 \text{ g s cm}^{-3}$ .

DME oxidation over metal oxide catalysts is scarcely reported in the literature. Nevertheless, based on the reported results, we have calculated the specific reaction rates in DME oxidation and the results are summarized in Table S2.

**Table S2.** Summary of the literature in DME oxidation over (mixed) oxide catalysts.

| Catalyst                                                        | Feed                         | GHSV<br>(cm <sup>3</sup> g <sup>-1</sup> h <sup>-1</sup> ) | S <sub>BET</sub><br>(m <sup>2</sup> g <sup>-1</sup> ) | T <sub>10</sub><br>(°C) | T <sub>90</sub><br>(°C)                  | Specific reaction rate<br>(nmol m <sup>-2</sup> s <sup>-1</sup> ) | Ref.      |
|-----------------------------------------------------------------|------------------------------|------------------------------------------------------------|-------------------------------------------------------|-------------------------|------------------------------------------|-------------------------------------------------------------------|-----------|
| α-MnO <sub>2</sub>                                              | 2% DME, 20% O <sub>2</sub>   | 30000                                                      | 53                                                    | 170                     | 240                                      | 14 (170 °C)                                                       | [5]       |
| CoFe <sub>2</sub> O <sub>4</sub>                                | 1% CO, 10% O <sub>2</sub>    | 45000                                                      | -                                                     | 280                     | 400                                      | n.d.                                                              | [34]      |
| Meso-TiO <sub>2</sub>                                           | 2% DME, 20% O <sub>2</sub>   | 24000                                                      | 125                                                   | 310                     | n.d.<br>(360 °C, X <sub>DME</sub> = 30%) | 0.5 (240 °C)                                                      | [15]      |
| Meso-ZrO <sub>2</sub>                                           | 2% DME, 20% O <sub>2</sub>   | 24000                                                      | 142                                                   | 315                     | n.d.<br>(360 °C, X <sub>DME</sub> = 30%) | 1.3 (280 °C)                                                      | [15]      |
| Meso-CeO <sub>2</sub> -<br>TiO <sub>2</sub>                     | 2% DME, 20% O <sub>2</sub>   | 24000                                                      | 103                                                   | 280                     | n.d.<br>(360 °C, X <sub>DME</sub> = 75%) | 1.7 (240 °C)                                                      | [15]      |
| Meso-CeO <sub>2</sub> -<br>ZrO <sub>2</sub>                     | 2% DME, 20% O <sub>2</sub>   | 24000                                                      | 124                                                   | 290                     | n.d.<br>(360 °C, X <sub>DME</sub> = 65%) | 2.4 (280 °C)                                                      | [15]      |
| Cu <sub>2</sub> Mn <sub>1</sub> /Al <sub>2</sub> O <sub>3</sub> | 1.5% DME, 20% O <sub>2</sub> | 10000                                                      | 177                                                   | 250                     | 340                                      | 0.6 (240 °C)                                                      | [7]       |
| Fe <sub>0.67</sub> Cu <sub>0.33</sub>                           | 0.09% DME, 8% O <sub>2</sub> | 36000                                                      | 33                                                    | 220                     | 290                                      | 2.4 (240 °C)                                                      | This work |

n.d.=not determined
